# Supplementary material for: Photochemical and Ga2O3-photoassisted decomposition of the insecticide Fipronil in aqueous media upon UVC radiation
Source: Royal Society of Chemistry journal article supplement (doi:10.1039/c4nj00527a), 2014-01-01
Supplement: c4nj00527a1.pdf [file c4nj00527a1.pdf]

**Supporting information**

**Photochemical and Ga<sub>2</sub>O<sub>3</sub>-photoassisted decomposition of the insecticide Fipronil in aqueous media with UVC radiation**

**Hisao Hidaka,<sup>a\*</sup> Tohru Tsukamoto,<sup>a</sup> Yoshihiro Mitsutsuka,<sup>a</sup> Takeji Takamura,<sup>b</sup>  
and Nick Serpone<sup>c</sup>**

<sup>a</sup> Department of Chemistry, Meisei University, 2-1-1 Hodokubo, Hino-shi, 191-8506, Tokyo, Japan

<sup>b</sup> Department of Chemistry, Kanagawa Institute of Technology, 1030, Shinoogino, Atsugi, Kanagawa 345-0292, Japan

<sup>c</sup> PhotoGreen Laboratory, Dipartimento di Chimica, Università di Pavia, via Taramelli 12, Pavia 27100, Italy

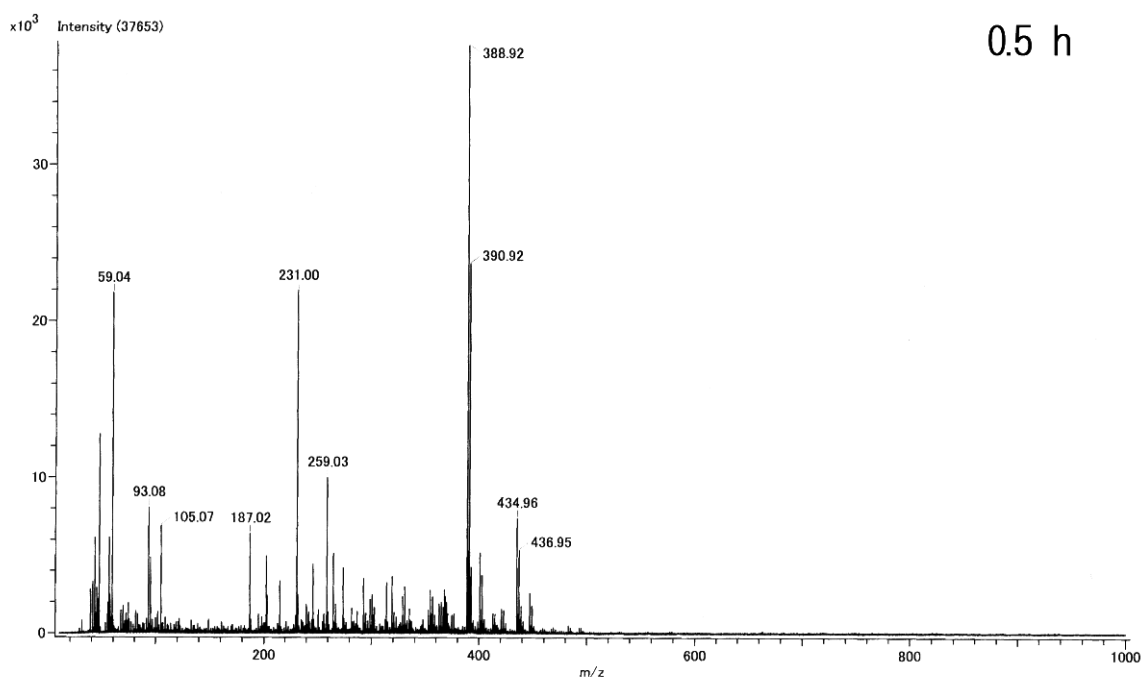

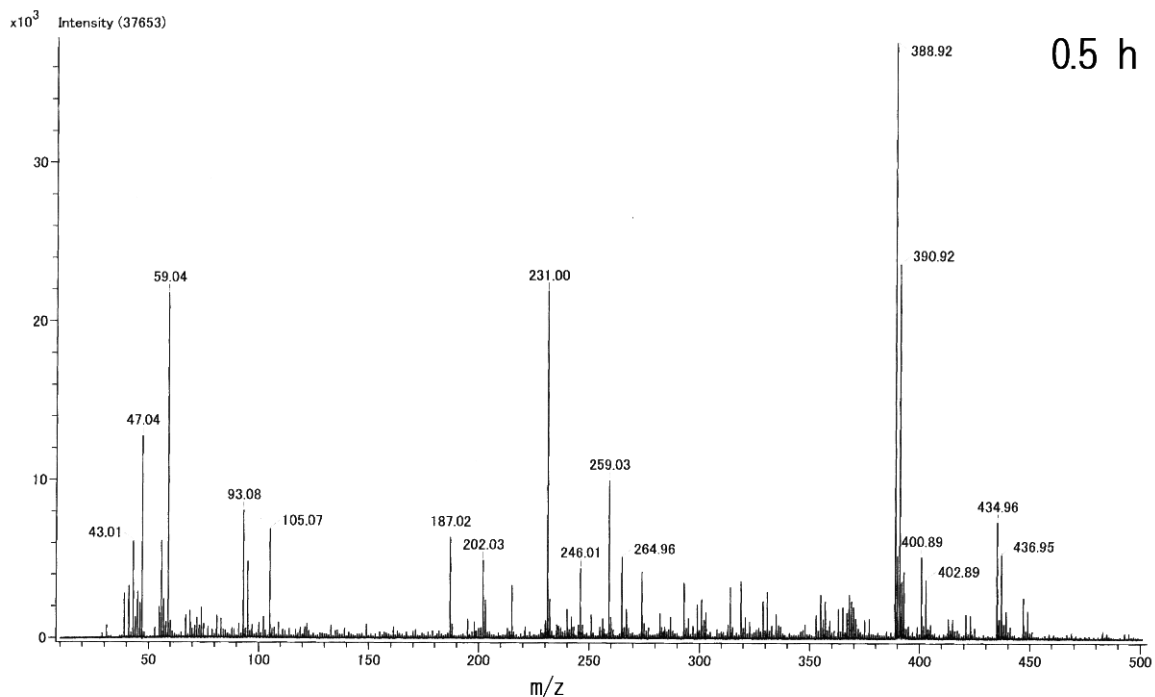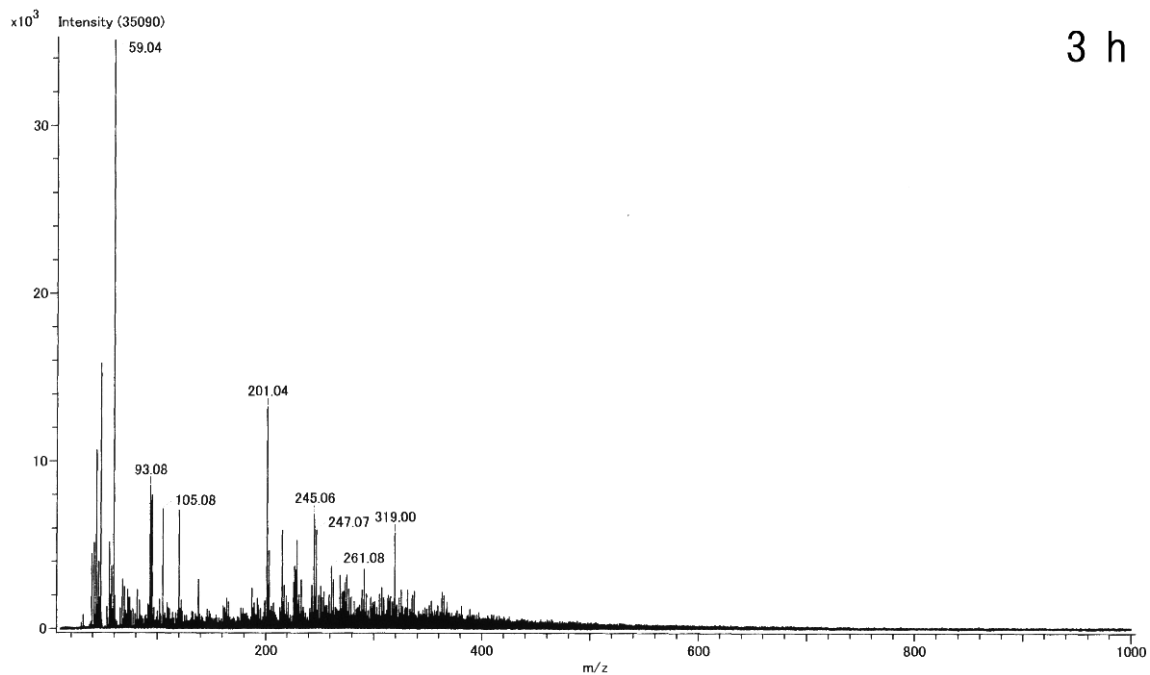

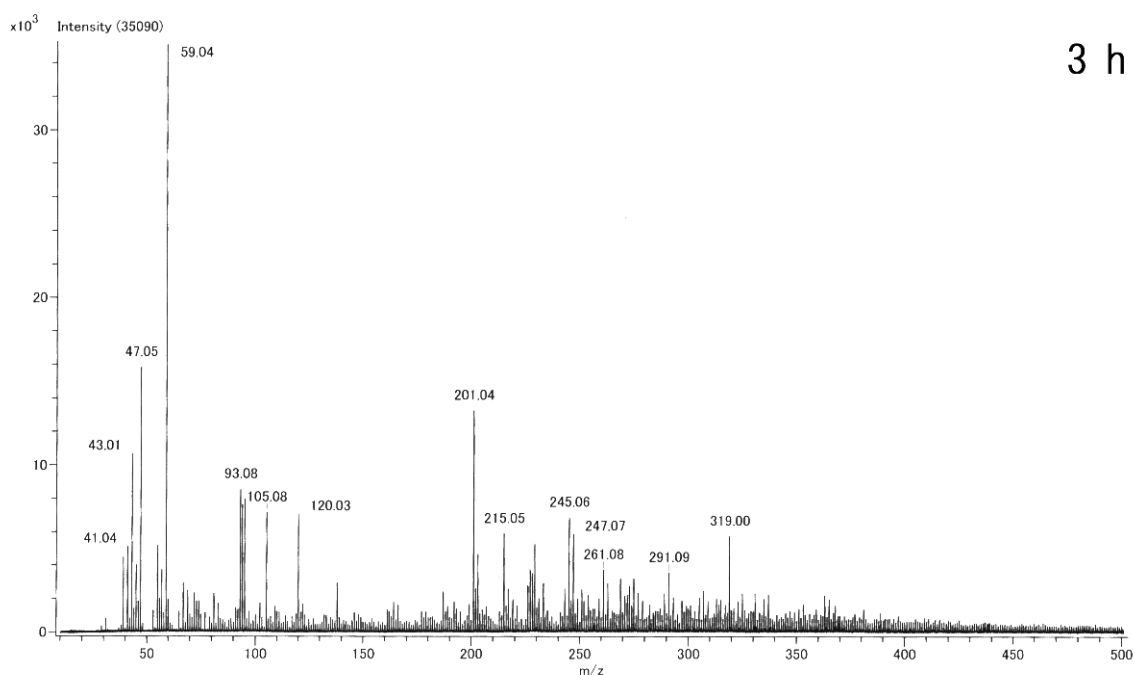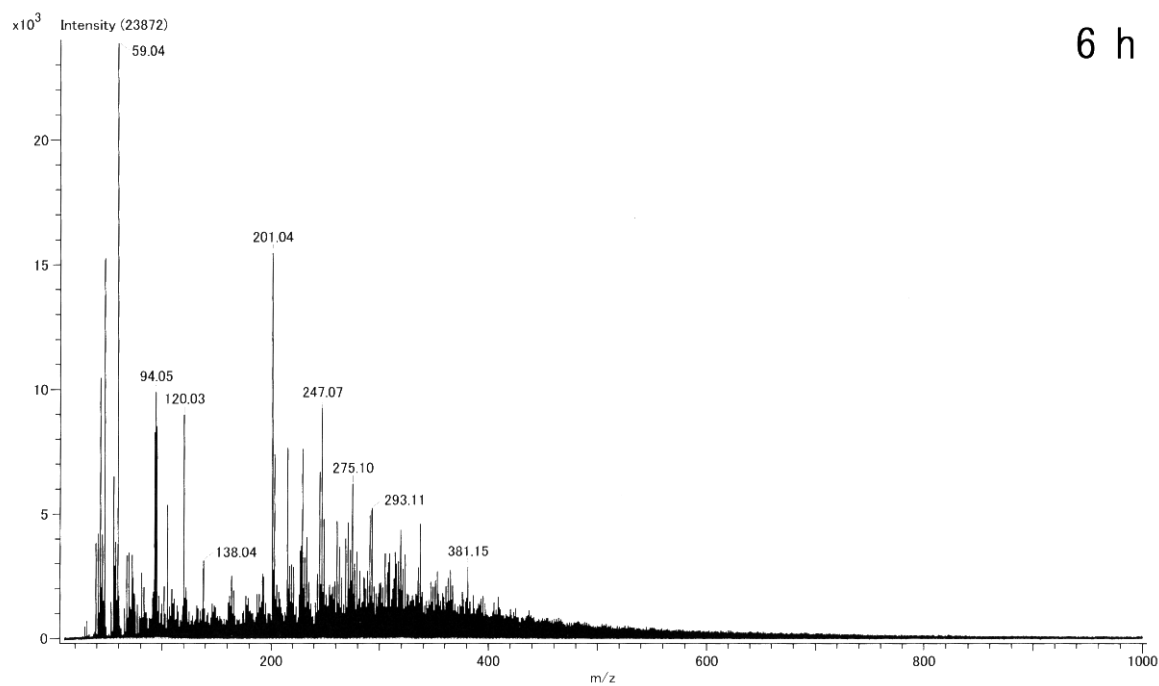

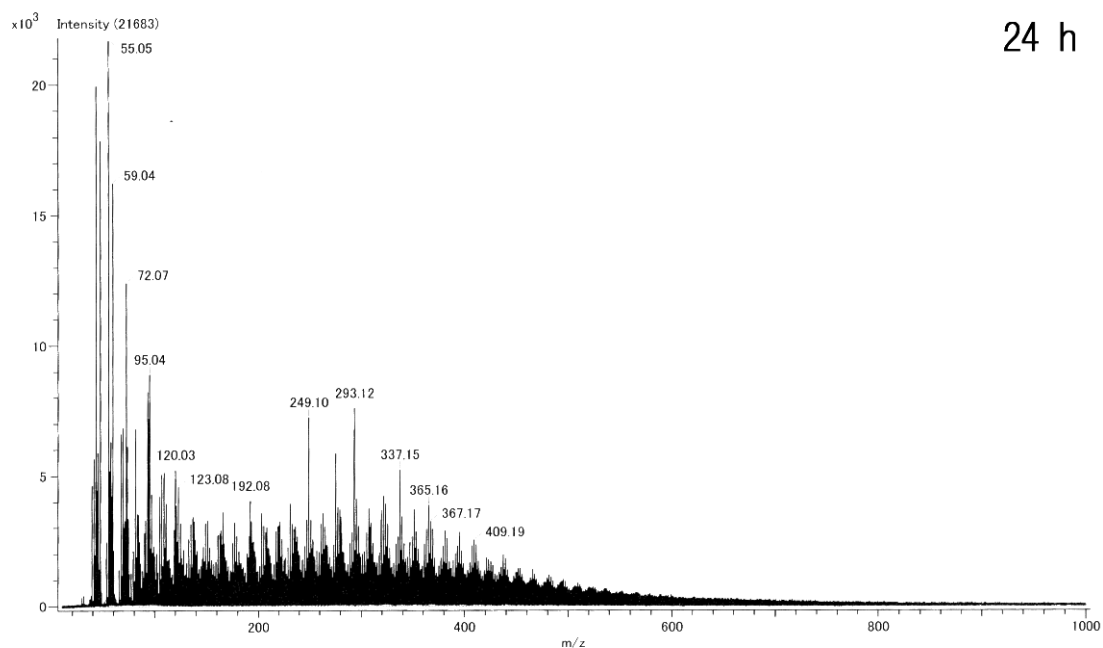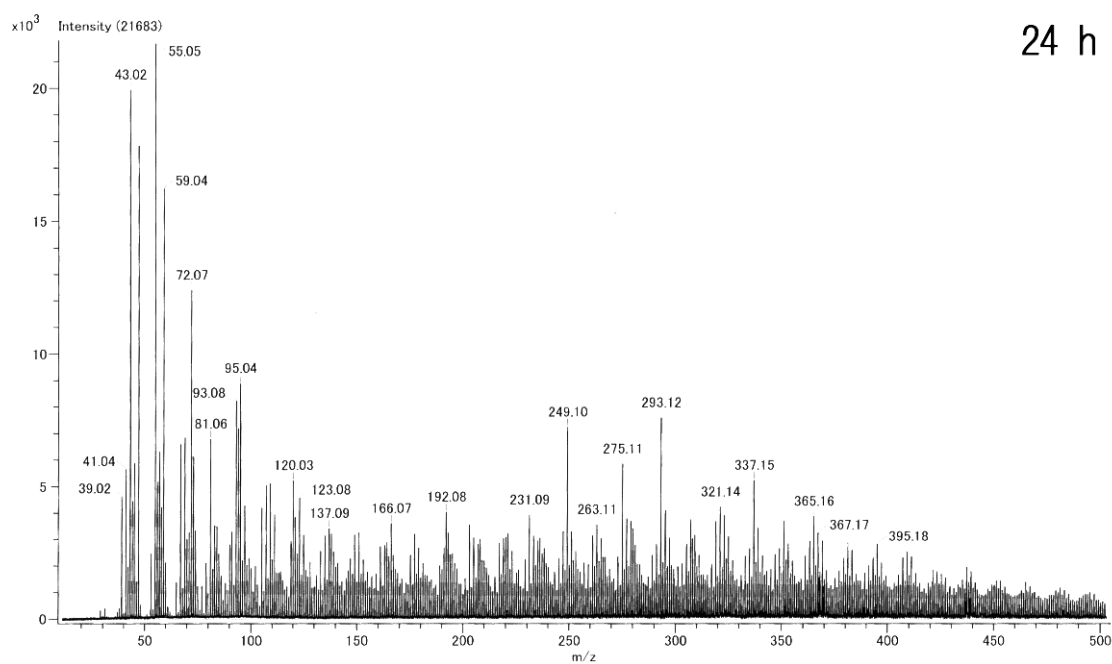

**Figure S1.** Time of flight mass spectral (TOF-MS) patterns of Fipronil during its degradation with  $m/z = 0$  to 500 and up to  $m/z = 1000$  up from 0 to 24 hours of UVC irradiation in aqueous media.
